# Supplementary material
Source: PubMed Central journal article supplement (PMC3126647)
Supplement: supp_111.180620_JPET180620_Fig_1.pdf [file supp_111.180620_JPET180620_Fig_1.pdf]

Catalase and SOD conjugated with PECAM antibody distinctly alleviate abnormal endothelial permeability caused by exogenous ROS and vascular endothelial growth factor

Jingyan Han, Vladimir V. Shuvaev, Vladimir R. Muzykantov

the Journal of Pharmacology and Experimental therapeutics

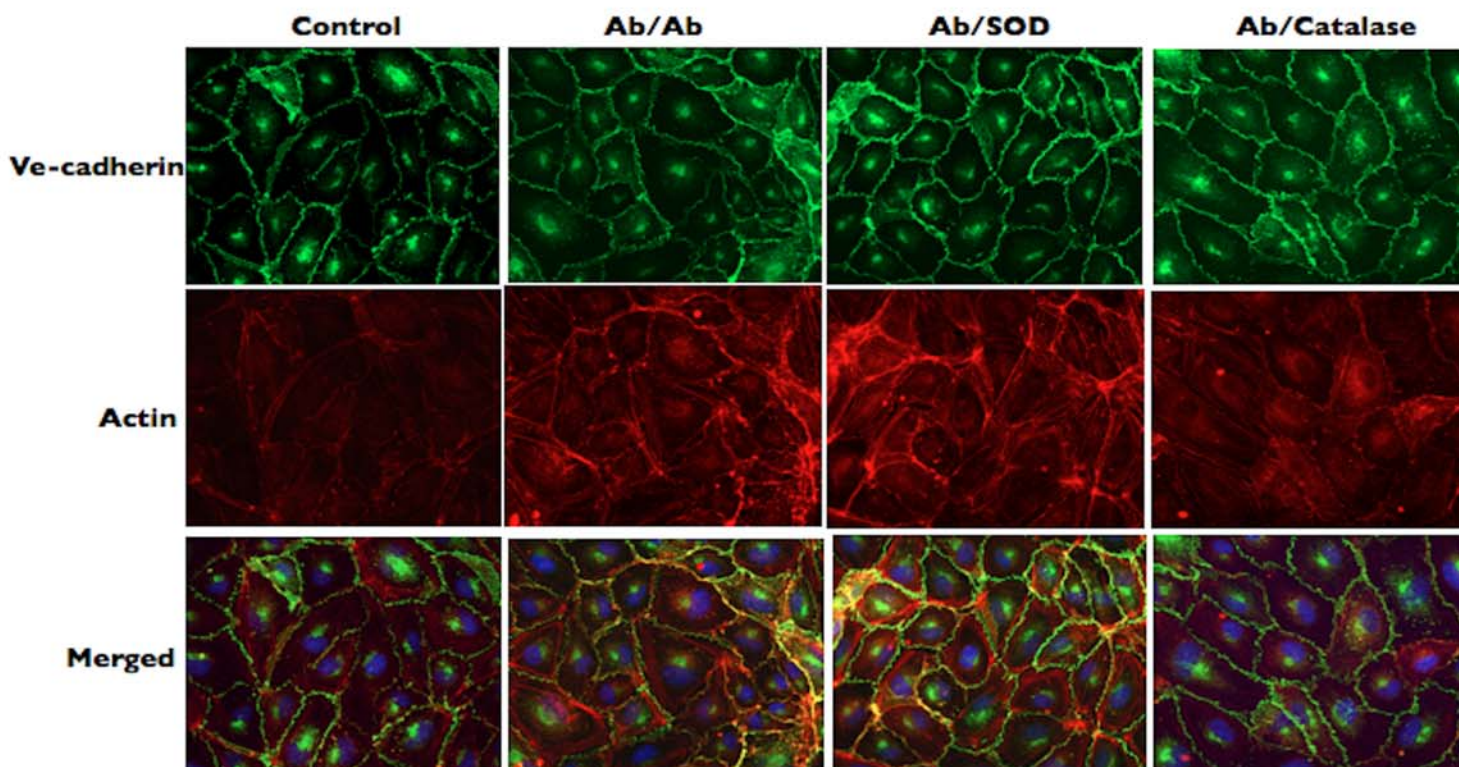

**Supplemental Figure 1. Treatment of anti-PECAM-1 Ab (Ab) conjugates does not impair the basal endothelial barrier integrity.** Effect of conjugates on integrity of the endothelial adhesion junctional complex. Confluent HUVECs, grown on gelatin-coated glass coverslips, were treated with control, Ab/Ab, Ab/SOD and Ab/catalase conjugates (100  $\mu\text{g}/\text{ml}$ ) for 1 hour. Cell were then washed, fixed and stained with goat anti-VE-cadherin antibody followed by Alexa Fluor 488 conjugated anti-goat (shown as green). F-actin was stained with Alexa-594-phalloidin (shown as red). Images were taken using fluorescence microscope with a Plan Apo X 40/1.0 oil objective. HUVECs treated with drug-free Ab/Ab conjugates exhibited intact cell-cell adhesion junction, as evidenced by contiguous distribution of VE-cadherin at cell-cell border. F-actin content was increased in HUVECs treated with Ab/Ab, Ab/Catalase and Ab/SOD conjugates, compared with that in non-conjugate-treated cells.

**Supplemental Figure 1**
