# Supplementary material
Source: PubMed Central journal article supplement (PMC3126647)
Supplement: supp_111.180620_JPET180620_fig_2.pdf [file supp_111.180620_JPET180620_fig_2.pdf]

Catalase and SOD conjugated with PECAM antibody distinctly alleviate abnormal endothelial permeability caused by exogenous ROS and vascular endothelial growth factor

Jingyan Han, Vladimir V. Shuvaev, Vladimir R. Muzykantov

the Journal of Pharmacology and Experimental therapeutics

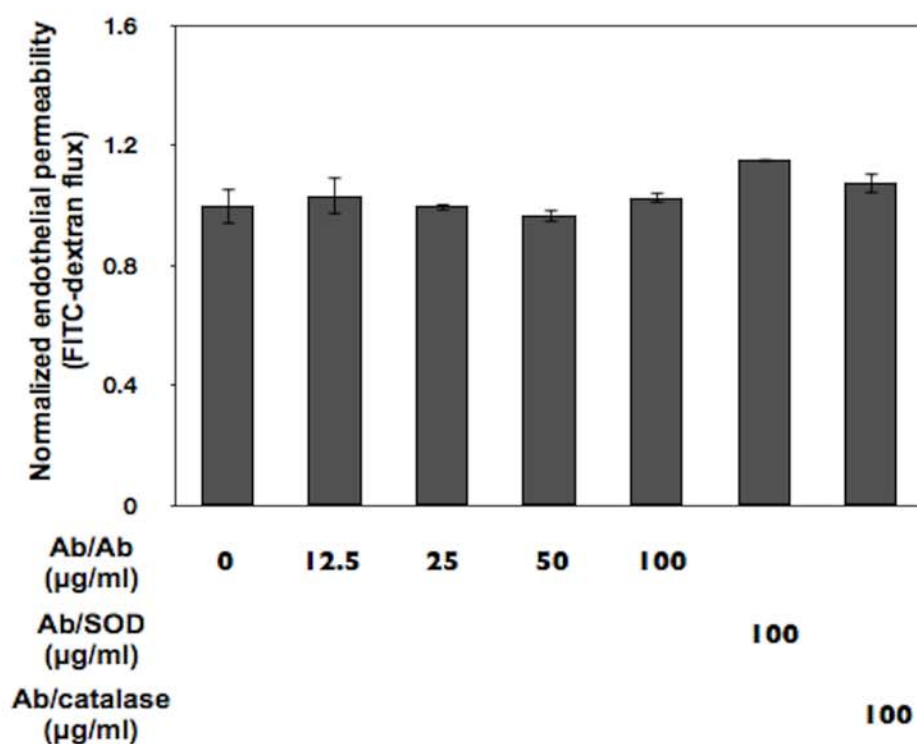

**Supplemental Figure 2. Treatment of anti-PECAM-1 Ab(Ab) conjugates does not impair the basal endothelial barrier function.** The FITC-dextran influx was measured to evaluate the endothelial permeability of HUVEC monolayers exposed to conjugates of Ab/Ab (0, 12.5, 25, 50, 100 µg/ml), Ab/SOD (100 µg/ml) and Ab/catalase (100 µg/ml) for 1 hour at 37°C. Values are the normalized percentage of total FITC-dextran passing across cells relative to control group. Error bars represent the S.D. (n=3).

**Supplemental Figure 2**
